# Supplementary material
Source: PubMed Central journal article supplement (PMC4350370)
Supplement: NIHMS632539-supplement-01.pdf [file NIHMS632539-supplement-01.pdf]

**[Online Supplement]**

Targeted rejection predicts decreased anti-inflammatory gene expression and increased symptom severity in youth with asthma

*Supplementary Table S1: Descriptive Information for All Study Variables Across All Study Visits*

| <b>Variable Name</b>                                     | <b><i>n</i></b> | <b><i>M</i></b> | <b><i>SD</i></b> | <b>Minimum</b> | <b>Maximum</b> |
|----------------------------------------------------------|-----------------|-----------------|------------------|----------------|----------------|
| Age (years at baseline)                                  |                 | 12.61           | 2.63             | 9              | 18             |
| Males                                                    | 81              |                 |                  |                |                |
| Females                                                  | 40              |                 |                  |                |                |
| Caucasians                                               | 76              |                 |                  |                |                |
| Other ethnicities                                        | 45              |                 |                  |                |                |
| Subjective social status (1 – 10)                        |                 | 6.60            | 1.48             | 1              | 9              |
| V1 Body mass index                                       |                 | 21.00           | 4.28             | 14.08          | 41.10          |
| V1 Days of corticosteroid use <sup>a</sup> (0 – 14)      |                 | 4.59            | 5.97             | 0              | 14             |
| V1 Days of beta agonist use <sup>a</sup> (0 – 14)        |                 | 3.76            | 5.51             | 0              | 14             |
| V1 Neutrophils ( $\times 10^9$ cells/L)                  |                 | 3.37            | 1.34             | 0.70           | 8.50           |
| V1 Lymphocytes ( $\times 10^9$ cells/L)                  |                 | 2.50            | 0.78             | 1.00           | 4.80           |
| V1 Monocytes ( $\times 10^9$ cells/L)                    |                 | 0.47            | 0.18             | 0.03           | 1.10           |
| V1 Non-interpersonal events                              | 11              |                 |                  |                |                |
| V1 Interpersonal events                                  | 25              |                 |                  |                |                |
| V1 Targeted rejection events                             | 1               |                 |                  |                |                |
| V1 GR <sup>b</sup> mRNA (relative expression)            |                 | 5.70            | 1.36             | 1.00           | 9.74           |
| V1 $\beta 2$ -AR <sup>c</sup> mRNA (relative expression) |                 | 6.70            | 2.93             | 1.00           | 13.80          |
| V1 Symptom severity <sup>d</sup> (0 – 4)                 |                 | 0.38            | 0.44             | 0.00           | 2.26           |
| V2 Body mass index                                       |                 | 21.32           | 4.14             | 13.95          | 31.05          |
| V2 Days of corticosteroid use (0 – 14)                   |                 | 3.44            | 5.68             | 0              | 14             |
| V2 Days of beta agonist use (0 – 14)                     |                 | 3.82            | 5.69             | 0              | 14             |
| V2 Neutrophils ( $\times 10^9$ cells/L)                  |                 | 3.57            | 1.62             | 0.77           | 12.27          |
| V2 Lymphocytes ( $\times 10^9$ cells/L)                  |                 | 2.61            | 0.74             | 1.10           | 4.25           |
| V2 Monocytes ( $\times 10^9$ cells/L)                    |                 | 0.51            | 0.20             | 0.15           | 1.20           |
| V2 Non-interpersonal events                              | 7               |                 |                  |                |                |
| V2 Interpersonal events                                  | 13              |                 |                  |                |                |
| V2 Targeted rejection events                             | 4               |                 |                  |                |                |
| V2 GR mRNA (relative expression)                         |                 | 5.06            | 1.51             | 1.00           | 9.14           |
| V2 $\beta 2$ -AR mRNA (relative expression)              |                 | 6.41            | 3.05             | 1.00           | 13.16          |
| V2 Symptom severity (0 – 4)                              |                 | 0.33            | 0.44             | 0.00           | 2.05           |
| V3 Body mass index                                       |                 | 21.68           | 4.54             | 14.90          | 42.81          |
| V3 Days of corticosteroid use (0 – 14)                   |                 | 3.82            | 5.84             | 0              | 14             |
| V3 Days of beta agonist use (0 – 14)                     |                 | 3.91            | 5.54             | 0              | 14             |
| V3 Neutrophils ( $\times 10^9$ cells/L)                  |                 | 3.51            | 1.39             | 0.00           | 8.40           |
| V3 Lymphocytes ( $\times 10^9$ cells/L)                  |                 | 2.36            | 0.80             | 0.00           | 5.00           |
| V3 Monocytes ( $\times 10^9$ cells/L)                    |                 | 0.47            | 0.15             | 0.00           | 0.85           |
| V3 Non-interpersonal events                              | 11              |                 |                  |                |                |
| V3 Interpersonal events                                  | 16              |                 |                  |                |                |

## TARGETED REJECTION AND ASTHMA OUTCOMES

36

|                                            |    |       |      |       |       |
|--------------------------------------------|----|-------|------|-------|-------|
| V3 Targeted rejection events               | 3  |       |      |       |       |
| V3 GR mRNA (relative expression)           |    | 5.32  | 1.37 | 1.01  | 9.39  |
| V3 $\beta$ 2-AR mRNA (relative expression) |    | 6.18  | 2.61 | 1.00  | 15.46 |
| V3 Symptom severity (0 – 4)                |    | 0.29  | 0.38 | 0.00  | 1.80  |
| V4 Body mass index                         |    | 21.92 | 4.68 | 14.30 | 43.12 |
| V4 Days of corticosteroid use (0 – 14)     |    | 3.13  | 5.53 | 0     | 14    |
| V4 Days of beta agonist use (0 – 14)       |    | 3.18  | 4.89 | 0     | 14    |
| V4 Neutrophils ( $\times 10^9$ cells/L)    |    | 3.79  | 2.09 | 0.85  | 16.90 |
| V4 Lymphocytes ( $\times 10^9$ cells/L)    |    | 2.41  | 0.65 | 1.13  | 4.00  |
| V4 Monocytes ( $\times 10^9$ cells/L)      |    | 0.50  | 0.21 | 0.20  | 1.93  |
| V4 Non-interpersonal events                | 10 |       |      |       |       |
| V4 Interpersonal events                    | 9  |       |      |       |       |
| V4 Targeted rejection events               | 6  |       |      |       |       |
| V4 GR mRNA (relative expression)           |    | 4.61  | 1.08 | 2.00  | 7.18  |
| V4 $\beta$ 2-AR mRNA (relative expression) |    | 2.66  | 1.27 | 1.01  | 8.07  |
| V4 Symptom severity (0 – 4)                |    | 0.23  | 0.34 | 0.00  | 1.81  |
| V5 Body mass index                         |    | 22.52 | 5.09 | 14.76 | 42.66 |
| V5 Days of corticosteroid use (0 – 14)     |    | 3.18  | 5.40 | 0     | 14    |
| V5 Days of beta agonist use (0 – 14)       |    | 2.72  | 4.89 | 0     | 14    |
| V5 Neutrophils ( $\times 10^9$ cells/L)    |    | 3.89  | 1.78 | 1.05  | 8.70  |
| V5 Lymphocytes ( $\times 10^9$ cells/L)    |    | 2.28  | 0.84 | 0.97  | 4.65  |
| V5 Monocytes ( $\times 10^9$ cells/L)      |    | 0.48  | 0.16 | 0.20  | 1.10  |
| V5 Non-interpersonal events                | 12 |       |      |       |       |
| V5 Interpersonal events                    | 8  |       |      |       |       |
| V5 Targeted rejection events               | 3  |       |      |       |       |
| V5 GR mRNA (relative expression)           |    | 5.32  | 1.22 | 1.00  | 8.05  |
| V5 $\beta$ 2-AR mRNA (relative expression) |    | 5.08  | 1.53 | 1.00  | 9.01  |
| V5 Symptom severity (0 – 4)                |    | 0.25  | 0.34 | 0.00  | 1.48  |

<sup>a</sup> Medication use was assessed as number of days participant reported using inhaled corticosteroids and/or beta agonists during the 14 days prior to each visit.

<sup>b</sup> GR = glucocorticoid receptor

<sup>c</sup>  $\beta$ 2-AR =  $\beta$ 2-adrenergic receptor

<sup>d</sup> Asthma symptom severity was assessed as the average severity participants reported on a scale of 0 (*none*) to 4 (*really bad*) up to twice per day for up to two weeks following each visit.

## TARGETED REJECTION AND ASTHMA OUTCOMES

37

*Supplementary Table S2: Correlation Matrix of Baseline Study Variables*

| Variable Name                                    | 1 | 2     | 3     | 4     | 5      | 6       | 7      | 8     | 9     | 10     | 11     | 12    | 13    | 14     | 15      | 16      |
|--------------------------------------------------|---|-------|-------|-------|--------|---------|--------|-------|-------|--------|--------|-------|-------|--------|---------|---------|
| 1. Age (years)                                   | 1 | -.017 | -.056 | .055  | .330** | -.246** | .016   | .141  | .170  | .206*  | -.085  | .185* | .118  | .124   | -.255** | .015    |
| 2. Gender                                        |   | 1     | -.005 | -.014 | -.010  | -.121   | -.036  | -.054 | .213* | .099   | -.022  | -.032 | .064  | -.223* | -.203*  | -.267** |
| 3. Ethnicity                                     |   |       | 1     | .003  | -.082  | -.006   | .022   | .089  | -.027 | -.005  | .054   | -.055 | -.070 | .134   | -.033   | -.154   |
| 4. Subjective social status                      |   |       |       | 1     | -.109  | -.058   | -.134  | .002  | .101  | .016   | .009   | -.067 | .025  | .048   | .031    | .066    |
| 5. Body mass index                               |   |       |       |       | 1      | -.132   | .047   | .120  | -.077 | -.002  | -.135  | .204* | .077  | .183   | .066    | .160    |
| 6. Days took corticosteroids during past 2 weeks |   |       |       |       |        | 1       | .719** | -.025 | -.085 | -.029  | .242** | -.125 | -.071 | .046   | .009    | .066    |
| 7. Days took beta agonists during past 2 weeks   |   |       |       |       |        |         | 1      | .115  | .009  | .104   | .114   | -.039 | -.062 | .086   | -.026   | .090    |
| 8. Average symptom severity                      |   |       |       |       |        |         |        | 1     | -.048 | -.006  | .131   | .164  | -.049 | .027   | -.255** | -.184   |
| 9. GR mRNA                                       |   |       |       |       |        |         |        |       | 1     | .581** | -.100  | .092  | .084  | -.031  | .124    | -.023   |
| 10. $\beta$ 2-AR mRNA                            |   |       |       |       |        |         |        |       |       | 1      | .044   | .135  | .114  | -.137  | .031    | -.033   |
| 11. Non-interpersonal major life events          |   |       |       |       |        |         |        |       |       |        | 1      | -.161 | -.029 | -.110  | .004    | -.064   |
| 12. Interpersonal major life events              |   |       |       |       |        |         |        |       |       |        |        | 1     | -.047 | -.017  | .090    | .058    |
| 13. Targeted rejection major life events         |   |       |       |       |        |         |        |       |       |        |        |       | 1     | .010   | -.139   | -.094   |
| 14. Neutrophil count                             |   |       |       |       |        |         |        |       |       |        |        |       |       | 1      | .149    | .434**  |
| 15. Lymphocyte count                             |   |       |       |       |        |         |        |       |       |        |        |       |       |        | 1       | .580**  |
| 16. Monocyte count                               |   |       |       |       |        |         |        |       |       |        |        |       |       |        |         | 1       |

\*  $p < .05$ \*\*  $p < .01$

*Supplementary Table S3: Examples of Targeted Rejection Life Events Reported in the Study*

| <b>Example of a Broader Social Network Targeted Rejection Life Event</b>                                                                                                                                                                                                                                                                                                                                                                                            | <b>Example of a Romantic Relationship Targeted Rejection Life Event</b>                                                                                                                                                                                                 | <b>Example of a School-Related Targeted Rejection Life Event</b>                                                                                                                                                                                                                                                                                                                                                                                                                                                                                                                                          |
|---------------------------------------------------------------------------------------------------------------------------------------------------------------------------------------------------------------------------------------------------------------------------------------------------------------------------------------------------------------------------------------------------------------------------------------------------------------------|-------------------------------------------------------------------------------------------------------------------------------------------------------------------------------------------------------------------------------------------------------------------------|-----------------------------------------------------------------------------------------------------------------------------------------------------------------------------------------------------------------------------------------------------------------------------------------------------------------------------------------------------------------------------------------------------------------------------------------------------------------------------------------------------------------------------------------------------------------------------------------------------------|
| <p>A high school girl reported that her friends did not invite her to a party. However, they made a point of inviting other people to this party in front of her. One of these friends told her that she was not being invited because no one likes her. The friend went on to tell the participant that everyone was glad that she was not going to the party. She no longer socializes with this group of friends and reports not having any friends anymore.</p> | <p>A high school boy reported that his girlfriend told him she no longer loved him and then broke up with him. He still had feelings for her and had hoped that they could at least remain friends. However, this did not work out and he no longer sees this girl.</p> | <p>A high school girl reported that she was in math class when another student asked the teacher a question that angered the teacher. The teacher proceeded to yell at the student. The participant felt that the teacher had misunderstood the question, so she raised her hand and tried to explain what the question meant. The teacher got angry at the participant and yelled that she was just showing off. They got into an argument, and the teacher eventually kicked the participant out of his class. The participant had to finish the math class by taking lessons with a private tutor.</p> |

*Note:* These vignettes are intended to give the reader a general sense for the type of events that were coded as targeted rejection. Specific details about the contextual features of the events, and biographical details of the participants have been omitted to preserve participants' anonymity and confidentiality.

*Supplementary Table S4: Multilevel Modeling Output**S4-A: Within-person associations between targeted rejection major life events and GR mRNA*

| <b>Variable</b>                             | <b>Unstandardized Coefficient (b)</b> | <b>Standard Error</b> | <b>p-value</b> |
|---------------------------------------------|---------------------------------------|-----------------------|----------------|
| <b>Intercept (L1<sup>a</sup> Intercept)</b> |                                       |                       |                |
| Intercept (L2 <sup>b</sup> )                | 5.315                                 | 0.259                 | < .001         |
| Age (L2)                                    | -0.039                                | 0.041                 | .338           |
| Gender (L2)                                 | 0.266                                 | 0.279                 | .342           |
| Ethnicity (L2)                              | -0.103                                | 0.236                 | .664           |
| Body Mass Index (L2)                        | -0.005                                | 0.030                 | .861           |
| Subjective Social Status (L2)               | -0.002                                | 0.072                 | .981           |
| <b>Time (L1 Slope)</b>                      |                                       |                       |                |
| Intercept (L2)                              | -0.006                                | 0.013                 | .660           |
| Age (L2)                                    | 0.004                                 | 0.003                 | .156           |
| Gender (L2)                                 | -0.014                                | 0.015                 | .343           |
| Ethnicity (L2)                              | -0.002                                | 0.014                 | .901           |
| Body Mass Index (L2)                        | 0.001                                 | 0.002                 | .548           |
| Subjective Social Status (L2)               | 0.001                                 | 0.003                 | .712           |
| <b>Corticosteroid Use (L1 Slope)</b>        |                                       |                       |                |
| Intercept (L2)                              | -0.020                                | 0.034                 | .551           |
| Age (L2)                                    | -0.002                                | 0.006                 | .666           |
| Gender (L2)                                 | 0.001                                 | 0.036                 | .989           |
| Ethnicity (L2)                              | -0.015                                | 0.032                 | .648           |
| Body Mass Index (L2)                        | 0.010                                 | 0.002                 | < .001         |
| Subjective Social Status (L2)               | 0.023                                 | 0.007                 | .001           |
| <b>Beta Agonist Use (L1 slope)</b>          |                                       |                       |                |
| Intercept (L2)                              | 0.023                                 | 0.040                 | .565           |
| Age (L2)                                    | -0.008                                | 0.006                 | .187           |
| Gender (L2)                                 | -0.002                                | 0.041                 | .967           |
| Ethnicity (L2)                              | -0.008                                | 0.038                 | .842           |
| Body Mass Index (L2)                        | -0.008                                | 0.003                 | .012           |
| Subjective Social Status (L2)               | -0.016                                | 0.008                 | .035           |
| <b>Targeted Rejection (L1 Slope)</b>        |                                       |                       |                |
| Intercept (L2)                              | -1.621                                | 0.649                 | .014           |
| Age (L2)                                    | -0.552                                | 0.131                 | < .001         |
| Gender (L2)                                 | 1.675                                 | 0.630                 | .009           |
| Ethnicity (L2)                              | 0.030                                 | 0.685                 | .965           |
| Body Mass Index (L2)                        | 0.041                                 | 0.094                 | .666           |
| Subjective Social Status (L2)               | -0.460                                | 0.193                 | .019           |

<sup>a</sup> L1 = Level 1<sup>b</sup> L2 = Level 2

## TARGETED REJECTION AND ASTHMA OUTCOMES

40

*S4-B: Within-person associations between targeted rejection major life events and  $\beta$ 2-AR mRNA*

| Variable                                    | Unstandardized Coefficient (b) | Standard Error | p-value |
|---------------------------------------------|--------------------------------|----------------|---------|
| <b>Intercept (L1<sup>a</sup> Intercept)</b> |                                |                |         |
| Intercept (L2 <sup>b</sup> )                | 6.553                          | 0.590          | < .001  |
| Age (L2)                                    | -0.130                         | 0.114          | .258    |
| Gender (L2)                                 | 0.314                          | 0.650          | .629    |
| Ethnicity (L2)                              | -0.082                         | 0.584          | .890    |
| Body Mass Index (L2)                        | -0.009                         | 0.075          | .905    |
| Subjective Social Status (L2)               | -0.161                         | 0.182          | .379    |
| <b>Time (L1 Slope)</b>                      |                                |                |         |
| Intercept (L2)                              | -0.084                         | 0.024          | .001    |
| Age (L2)                                    | 0.008                          | 0.005          | .068    |
| Gender (L2)                                 | -0.035                         | 0.026          | .182    |
| Ethnicity (L2)                              | -0.017                         | 0.025          | .498    |
| Body Mass Index (L2)                        | -0.002                         | 0.003          | .457    |
| Subjective Social Status (L2)               | 0.003                          | 0.007          | .689    |
| <b>Corticosteroid Use (L1 Slope)</b>        |                                |                |         |
| Intercept (L2)                              | -0.027                         | 0.072          | .710    |
| Age (L2)                                    | 0.002                          | 0.014          | .894    |
| Gender (L2)                                 | -0.016                         | 0.092          | .860    |
| Ethnicity (L2)                              | -0.010                         | 0.083          | .902    |
| Body Mass Index (L2)                        | 0.015                          | 0.006          | .008    |
| Subjective Social Status (L2)               | 0.020                          | 0.017          | .237    |
| <b>Beta Agonist Use (L1 slope)</b>          |                                |                |         |
| Intercept (L2)                              | 0.070                          | 0.095          | .465    |
| Age (L2)                                    | -0.022                         | 0.015          | .145    |
| Gender (L2)                                 | -0.011                         | 0.112          | .923    |
| Ethnicity (L2)                              | -0.015                         | 0.100          | .879    |
| Body Mass Index (L2)                        | -0.015                         | 0.008          | .061    |
| Subjective Social Status (L2)               | -0.004                         | 0.019          | .840    |
| <b>Targeted Rejection (L1 Slope)</b>        |                                |                |         |
| Intercept (L2)                              | -3.196                         | 1.144          | .007    |
| Age (L2)                                    | -0.923                         | 0.271          | .001    |
| Gender (L2)                                 | 3.625                          | 1.174          | .003    |
| Ethnicity (L2)                              | -0.293                         | 1.439          | .839    |
| Body Mass Index (L2)                        | 0.279                          | 0.175          | .112    |
| Subjective Social Status (L2)               | -0.589                         | 0.302          | .054    |

<sup>a</sup> L1 = Level 1<sup>b</sup> L2 = Level 2

## TARGETED REJECTION AND ASTHMA OUTCOMES

*S4-C: Within-person associations between targeted rejection major life events and asthma symptoms*

| <b>Variable</b>                             | <b>Unstandardized Coefficient (b)</b> | <b>Standard Error</b> | <b>p-value</b> |
|---------------------------------------------|---------------------------------------|-----------------------|----------------|
| <b>Intercept (L1<sup>a</sup> Intercept)</b> |                                       |                       |                |
| Intercept (L2 <sup>b</sup> )                | 0.407                                 | 0.072                 | < .001         |
| Age (L2)                                    | -0.018                                | 0.015                 | .248           |
| Gender (L2)                                 | -0.094                                | 0.080                 | .242           |
| Ethnicity (L2)                              | 0.025                                 | 0.083                 | .768           |
| Body Mass Index (L2)                        | -0.014                                | 0.011                 | .220           |
| Subjective Social Status (L2)               | -0.009                                | 0.028                 | .754           |
| <b>Time (L1 Slope)</b>                      |                                       |                       |                |
| Intercept (L2)                              | -0.005                                | 0.003                 | .134           |
| Age (L2)                                    | -0.001                                | 0.001                 | .288           |
| Gender (L2)                                 | 0.005                                 | 0.003                 | .107           |
| Ethnicity (L2)                              | -0.004                                | 0.004                 | .257           |
| Body Mass Index (L2)                        | 0.001                                 | < 0.001               | .088           |
| Subjective Social Status (L2)               | < 0.001                               | 0.001                 | .661           |
| <b>Corticosteroid Use (L1 Slope)</b>        |                                       |                       |                |
| Intercept (L2)                              | -0.027                                | 0.010                 | .006           |
| Age (L2)                                    | 0.002                                 | 0.002                 | .231           |
| Gender (L2)                                 | 0.020                                 | 0.011                 | .070           |
| Ethnicity (L2)                              | 0.018                                 | 0.009                 | .044           |
| Body Mass Index (L2)                        | 0.001                                 | 0.001                 | .449           |
| Subjective Social Status (L2)               | 0.004                                 | 0.002                 | .051           |
| <b>Beta Agonist Use (L1 slope)</b>          |                                       |                       |                |
| Intercept (L2)                              | 0.032                                 | 0.009                 | .001           |
| Age (L2)                                    | -0.003                                | 0.002                 | .127           |
| Gender (L2)                                 | -0.023                                | 0.011                 | .043           |
| Ethnicity (L2)                              | -0.013                                | 0.010                 | .186           |
| Body Mass Index (L2)                        | 0.001                                 | 0.001                 | .284           |
| Subjective Social Status (L2)               | -0.003                                | 0.002                 | .189           |
| <b>Targeted Rejection (L1 Slope)</b>        |                                       |                       |                |
| Intercept (L2)                              | 0.072                                 | 0.102                 | .480           |
| Age (L2)                                    | 0.079                                 | 0.037                 | .037           |
| Gender (L2)                                 | 0.126                                 | 0.117                 | .282           |
| Ethnicity (L2)                              | 0.311                                 | 0.109                 | .006           |
| Body Mass Index (L2)                        | 0.020                                 | 0.039                 | .609           |
| Subjective Social Status (L2)               | 0.177                                 | 0.035                 | < .001         |

<sup>a</sup> L1 = Level 1

<sup>b</sup> L2 = Level 2



## TARGETED REJECTION AND ASTHMA OUTCOMES

42

*S4-D: Within-person associations between interpersonal major life events and GR mRNA*

| <b>Variable</b>                             | <b>Unstandardized Coefficient (b)</b> | <b>Standard Error</b> | <b>p-value</b> |
|---------------------------------------------|---------------------------------------|-----------------------|----------------|
| <b>Intercept (L1<sup>a</sup> Intercept)</b> |                                       |                       |                |
| Intercept (L2 <sup>b</sup> )                | 5.343                                 | 0.263                 | < .001         |
| Age (L2)                                    | -0.041                                | 0.041                 | .325           |
| Gender (L2)                                 | 0.241                                 | 0.287                 | .402           |
| Ethnicity (L2)                              | -0.101                                | 0.241                 | .675           |
| Body Mass Index (L2)                        | -0.004                                | 0.030                 | .894           |
| Subjective Social Status (L2)               | 0.006                                 | 0.073                 | .940           |
| <b>Time (L1 Slope)</b>                      |                                       |                       |                |
| Intercept (L2)                              | -0.006                                | 0.013                 | .624           |
| Age (L2)                                    | 0.004                                 | 0.003                 | .137           |
| Gender (L2)                                 | -0.014                                | 0.015                 | .364           |
| Ethnicity (L2)                              | -0.003                                | 0.014                 | .847           |
| Body Mass Index (L2)                        | 0.001                                 | 0.002                 | .583           |
| Subjective Social Status (L2)               | 0.001                                 | 0.003                 | .775           |
| <b>Corticosteroid Use (L1 Slope)</b>        |                                       |                       |                |
| Intercept (L2)                              | -0.030                                | 0.034                 | .381           |
| Age (L2)                                    | -0.001                                | 0.006                 | .821           |
| Gender (L2)                                 | 0.007                                 | 0.036                 | .838           |
| Ethnicity (L2)                              | -0.011                                | 0.033                 | .726           |
| Body Mass Index (L2)                        | 0.009                                 | 0.003                 | .001           |
| Subjective Social Status (L2)               | 0.023                                 | 0.006                 | .001           |
| <b>Beta Agonist Use (L1 slope)</b>          |                                       |                       |                |
| Intercept (L2)                              | 0.025                                 | 0.041                 | .545           |
| Age (L2)                                    | -0.010                                | 0.006                 | .141           |
| Gender (L2)                                 | -0.002                                | 0.042                 | .963           |
| Ethnicity (L2)                              | -0.008                                | 0.038                 | .834           |
| Body Mass Index (L2)                        | -0.008                                | 0.003                 | .018           |
| Subjective Social Status (L2)               | -0.017                                | 0.008                 | .039           |
| <b>Interpersonal Events (L1 Slope)</b>      |                                       |                       |                |
| Intercept (L2)                              | 0.206                                 | 0.530                 | .698           |
| Age (L2)                                    | -0.064                                | 0.115                 | .578           |
| Gender (L2)                                 | -0.212                                | 0.531                 | .690           |
| Ethnicity (L2)                              | 0.083                                 | 0.492                 | .867           |
| Body Mass Index (L2)                        | -0.013                                | 0.066                 | .840           |
| Subjective Social Status (L2)               | -0.153                                | 0.106                 | .153           |

<sup>a</sup> L1 = Level 1<sup>b</sup> L2 = Level 2

*S4-E: Within person associations between interpersonal events major life and  $\beta$ 2-AR mRNA*

| <b>Variable</b>                             | <b>Unstandardized Coefficient (b)</b> | <b>Standard Error</b> | <b>p-value</b> |
|---------------------------------------------|---------------------------------------|-----------------------|----------------|
| <b>Intercept (L1<sup>a</sup> Intercept)</b> |                                       |                       |                |
| Intercept (L2 <sup>b</sup> )                | 6.690                                 | 0.578                 | < .001         |
| Age (L2)                                    | -0.138                                | 0.114                 | .228           |
| Gender (L2)                                 | 0.122                                 | 0.651                 | .852           |
| Ethnicity (L2)                              | 0.033                                 | 0.594                 | .956           |
| Body Mass Index (L2)                        | 0.006                                 | 0.075                 | .934           |
| Subjective Social Status (L2)               | -0.149                                | 0.182                 | .415           |
| <b>Time (L1 Slope)</b>                      |                                       |                       |                |
| Intercept (L2)                              | -0.089                                | 0.024                 | .001           |
| Age (L2)                                    | 0.009                                 | 0.005                 | .059           |
| Gender (L2)                                 | -0.027                                | 0.027                 | .331           |
| Ethnicity (L2)                              | -0.024                                | 0.025                 | .341           |
| Body Mass Index (L2)                        | -0.003                                | 0.003                 | .388           |
| Subjective Social Status (L2)               | 0.002                                 | 0.007                 | .806           |
| <b>Corticosteroid Use (L1 Slope)</b>        |                                       |                       |                |
| Intercept (L2)                              | -0.056                                | 0.069                 | .423           |
| Age (L2)                                    | 0.006                                 | 0.014                 | .688           |
| Gender (L2)                                 | 0.007                                 | 0.092                 | .943           |
| Ethnicity (L2)                              | -0.014                                | 0.081                 | .864           |
| Body Mass Index (L2)                        | 0.013                                 | 0.006                 | .018           |
| Subjective Social Status (L2)               | 0.021                                 | 0.016                 | .214           |
| <b>Beta Agonist Use (L1 slope)</b>          |                                       |                       |                |
| Intercept (L2)                              | 0.074                                 | 0.095                 | .439           |
| Age (L2)                                    | -0.024                                | 0.015                 | .121           |
| Gender (L2)                                 | 0.002                                 | 0.113                 | .987           |
| Ethnicity (L2)                              | -0.034                                | 0.097                 | .723           |
| Body Mass Index (L2)                        | -0.017                                | 0.008                 | .032           |
| Subjective Social Status (L2)               | -0.002                                | 0.021                 | .913           |
| <b>Interpersonal Events (L1 Slope)</b>      |                                       |                       |                |
| Intercept (L2)                              | -0.160                                | 0.956                 | .868           |
| Age (L2)                                    | -0.015                                | 0.160                 | .926           |
| Gender (L2)                                 | 0.449                                 | 1.069                 | .675           |
| Ethnicity (L2)                              | -0.552                                | 0.637                 | .388           |
| Body Mass Index (L2)                        | -0.141                                | 0.090                 | .118           |
| Subjective Social Status (L2)               | -0.107                                | 0.167                 | .522           |

<sup>a</sup> L1 = Level 1

<sup>b</sup> L2 = Level 2

## TARGETED REJECTION AND ASTHMA OUTCOMES

44

*S4-F: Within person associations between interpersonal major life events and asthma symptoms*

| <b>Variable</b>                             | <b>Unstandardized Coefficient (b)</b> | <b>Standard Error</b> | <b>p-value</b> |
|---------------------------------------------|---------------------------------------|-----------------------|----------------|
| <b>Intercept (L1<sup>a</sup> Intercept)</b> |                                       |                       |                |
| Intercept (L2 <sup>b</sup> )                | 0.394                                 | 0.073                 | < .001         |
| Age (L2)                                    | -0.018                                | 0.016                 | .254           |
| Gender (L2)                                 | -0.068                                | 0.082                 | .409           |
| Ethnicity (L2)                              | 0.020                                 | 0.085                 | .810           |
| Body Mass Index (L2)                        | -0.014                                | 0.012                 | .252           |
| Subjective Social Status (L2)               | -0.012                                | 0.028                 | .673           |
| <b>Time (L1 Slope)</b>                      |                                       |                       |                |
| Intercept (L2)                              | -0.005                                | 0.003                 | .167           |
| Age (L2)                                    | -0.001                                | 0.001                 | .355           |
| Gender (L2)                                 | 0.004                                 | 0.004                 | .265           |
| Ethnicity (L2)                              | -0.003                                | 0.004                 | .373           |
| Body Mass Index (L2)                        | 0.001                                 | < 0.001               | .089           |
| Subjective Social Status (L2)               | < 0.001                               | 0.001                 | .553           |
| <b>Corticosteroid Use (L1 Slope)</b>        |                                       |                       |                |
| Intercept (L2)                              | -0.026                                | 0.010                 | .012           |
| Age (L2)                                    | 0.002                                 | 0.002                 | .174           |
| Gender (L2)                                 | 0.019                                 | 0.012                 | .104           |
| Ethnicity (L2)                              | 0.016                                 | 0.009                 | .062           |
| Body Mass Index (L2)                        | 0.001                                 | 0.001                 | .452           |
| Subjective Social Status (L2)               | 0.004                                 | 0.002                 | .051           |
| <b>Beta Agonist Use (L1 slope)</b>          |                                       |                       |                |
| Intercept (L2)                              | 0.035                                 | 0.009                 | < .001         |
| Age (L2)                                    | -0.003                                | 0.002                 | .068           |
| Gender (L2)                                 | -0.026                                | 0.012                 | .028           |
| Ethnicity (L2)                              | -0.013                                | 0.010                 | .190           |
| Body Mass Index (L2)                        | 0.001                                 | 0.001                 | .150           |
| Subjective Social Status (L2)               | -0.003                                | 0.002                 | .207           |
| <b>Interpersonal Events (L1 Slope)</b>      |                                       |                       |                |
| Intercept (L2)                              | 0.061                                 | 0.066                 | .357           |
| Age (L2)                                    | 0.006                                 | 0.012                 | .633           |
| Gender (L2)                                 | -0.175                                | 0.077                 | .026           |
| Ethnicity (L2)                              | 0.027                                 | 0.072                 | .711           |
| Body Mass Index (L2)                        | < 0.001                               | 0.009                 | .971           |
| Subjective Social Status (L2)               | -0.017                                | 0.012                 | .143           |

<sup>a</sup> L1 = Level 1

<sup>b</sup> L2 = Level 2

*S4-G: Within person associations between non-interpersonal major life events and GR mRNA*

| <b>Variable</b>                             | <b>Unstandardized Coefficient (b)</b> | <b>Standard Error</b> | <b>p-value</b> |
|---------------------------------------------|---------------------------------------|-----------------------|----------------|
| <b>Intercept (L1<sup>a</sup> Intercept)</b> |                                       |                       |                |
| Intercept (L2 <sup>b</sup> )                | 5.432                                 | 0.255                 | < .001         |
| Age (L2)                                    | -0.036                                | 0.040                 | .375           |
| Gender (L2)                                 | 0.150                                 | 0.279                 | .591           |
| Ethnicity (L2)                              | -0.089                                | 0.231                 | .701           |
| Body Mass Index (L2)                        | -0.010                                | 0.028                 | .730           |
| Subjective Social Status (L2)               | 0.008                                 | 0.073                 | .919           |
| <b>Time (L1 Slope)</b>                      |                                       |                       |                |
| Intercept (L2)                              | -0.009                                | 0.013                 | .469           |
| Age (L2)                                    | 0.003                                 | 0.003                 | .200           |
| Gender (L2)                                 | -0.011                                | 0.014                 | .463           |
| Ethnicity (L2)                              | -0.003                                | 0.013                 | .793           |
| Body Mass Index (L2)                        | 0.001                                 | 0.002                 | .368           |
| Subjective Social Status (L2)               | < 0.001                               | 0.003                 | .879           |
| <b>Corticosteroid Use (L1 Slope)</b>        |                                       |                       |                |
| Intercept (L2)                              | -0.020                                | 0.033                 | .553           |
| Age (L2)                                    | -0.002                                | 0.006                 | .734           |
| Gender (L2)                                 | -0.002                                | 0.036                 | .948           |
| Ethnicity (L2)                              | -0.013                                | 0.031                 | .681           |
| Body Mass Index (L2)                        | 0.010                                 | 0.002                 | < .001         |
| Subjective Social Status (L2)               | 0.021                                 | 0.007                 | .002           |
| <b>Beta Agonist Use (L1 slope)</b>          |                                       |                       |                |
| Intercept (L2)                              | < 0.001                               | 0.041                 | .995           |
| Age (L2)                                    | -0.008                                | 0.007                 | .275           |
| Gender (L2)                                 | 0.023                                 | 0.044                 | .591           |
| Ethnicity (L2)                              | -0.007                                | 0.037                 | .844           |
| Body Mass Index (L2)                        | -0.009                                | 0.003                 | .005           |
| Subjective Social Status (L2)               | -0.014                                | 0.008                 | .092           |
| <b>Non-Interpersonal Events (L1 Slope)</b>  |                                       |                       |                |
| Intercept (L2)                              | 0.816                                 | 0.439                 | .066           |
| Age (L2)                                    | -0.194                                | 0.094                 | .041           |
| Gender (L2)                                 | -0.926                                | 0.519                 | .076           |
| Ethnicity (L2)                              | -0.130                                | 0.542                 | .811           |
| Body Mass Index (L2)                        | 0.130                                 | 0.093                 | .164           |
| Subjective Social Status (L2)               | -0.145                                | 0.141                 | .308           |

<sup>a</sup> L1 = Level 1

<sup>b</sup> L2 = Level 2

## TARGETED REJECTION AND ASTHMA OUTCOMES

46

*S4-H: Within person associations between non-interpersonal major life events and  $\beta$ 2-AR mRNA*

| Variable                                    | Unstandardized Coefficient (b) | Standard Error | p-value |
|---------------------------------------------|--------------------------------|----------------|---------|
| <b>Intercept (L1<sup>a</sup> Intercept)</b> |                                |                |         |
| Intercept (L2 <sup>b</sup> )                | 6.733                          | 0.587          | < .001  |
| Age (L2)                                    | -0.131                         | 0.113          | .248    |
| Gender (L2)                                 | 0.140                          | 0.655          | .831    |
| Ethnicity (L2)                              | -0.063                         | 0.570          | .913    |
| Body Mass Index (L2)                        | -0.035                         | 0.072          | .632    |
| Subjective Social Status (L2)               | -0.145                         | 0.186          | .439    |
| <b>Time (L1 Slope)</b>                      |                                |                |         |
| Intercept (L2)                              | -0.087                         | 0.024          | .001    |
| Age (L2)                                    | 0.008                          | 0.005          | .090    |
| Gender (L2)                                 | -0.035                         | 0.027          | .192    |
| Ethnicity (L2)                              | -0.022                         | 0.023          | .325    |
| Body Mass Index (L2)                        | -0.001                         | 0.003          | .829    |
| Subjective Social Status (L2)               | < 0.001                        | 0.006          | .950    |
| <b>Corticosteroid Use (L1 Slope)</b>        |                                |                |         |
| Intercept (L2)                              | -0.074                         | 0.064          | .246    |
| Age (L2)                                    | 0.004                          | 0.014          | .795    |
| Gender (L2)                                 | 0.028                          | 0.086          | .742    |
| Ethnicity (L2)                              | 0.042                          | 0.070          | .548    |
| Body Mass Index (L2)                        | 0.016                          | 0.006          | .004    |
| Subjective Social Status (L2)               | 0.020                          | 0.017          | .232    |
| <b>Beta Agonist Use (L1 slope)</b>          |                                |                |         |
| Intercept (L2)                              | 0.070                          | 0.091          | .441    |
| Age (L2)                                    | -0.020                         | 0.016          | .203    |
| Gender (L2)                                 | -0.001                         | 0.109          | .990    |
| Ethnicity (L2)                              | -0.058                         | 0.089          | .512    |
| Body Mass Index (L2)                        | -0.015                         | 0.008          | .053    |
| Subjective Social Status (L2)               | -0.001                         | 0.019          | .969    |
| <b>Non-Interpersonal Events (L1 Slope)</b>  |                                |                |         |
| Intercept (L2)                              | 1.034                          | 0.805          | .202    |
| Age (L2)                                    | -0.535                         | 0.199          | .009    |
| Gender (L2)                                 | -1.140                         | 1.149          | .324    |
| Ethnicity (L2)                              | -1.591                         | 1.079          | .143    |
| Body Mass Index (L2)                        | 0.215                          | 0.132          | .106    |
| Subjective Social Status (L2)               | -0.413                         | 0.273          | .133    |

<sup>a</sup> L1 = Level 1

<sup>b</sup> L2 = Level 2

## TARGETED REJECTION AND ASTHMA OUTCOMES

*S4-I: Within person associations between non-interpersonal major life events and asthma symptoms*

| <b>Variable</b>                             | <b>Unstandardized Coefficient (b)</b> | <b>Standard Error</b> | <b>p-value</b> |
|---------------------------------------------|---------------------------------------|-----------------------|----------------|
| <b>Intercept (L1<sup>a</sup> Intercept)</b> |                                       |                       |                |
| Intercept (L2 <sup>b</sup> )                | 0.377                                 | 0.069                 | < .001         |
| Age (L2)                                    | -0.017                                | 0.015                 | .244           |
| Gender (L2)                                 | -0.056                                | 0.077                 | .471           |
| Ethnicity (L2)                              | 0.013                                 | 0.075                 | .863           |
| Body Mass Index (L2)                        | -0.009                                | 0.010                 | .382           |
| Subjective Social Status (L2)               | -0.010                                | 0.027                 | .699           |
| <b>Time (L1 Slope)</b>                      |                                       |                       |                |
| Intercept (L2)                              | -0.005                                | 0.003                 | .099           |
| Age (L2)                                    | -0.001                                | < 0.001               | .239           |
| Gender (L2)                                 | 0.005                                 | 0.003                 | .098           |
| Ethnicity (L2)                              | -0.002                                | 0.003                 | .353           |
| Body Mass Index (L2)                        | 0.001                                 | < 0.001               | .066           |
| Subjective Social Status (L2)               | 0.001                                 | 0.001                 | .555           |
| <b>Corticosteroid Use (L1 Slope)</b>        |                                       |                       |                |
| Intercept (L2)                              | -0.019                                | 0.009                 | .030           |
| Age (L2)                                    | 0.002                                 | 0.002                 | .257           |
| Gender (L2)                                 | 0.011                                 | 0.009                 | .228           |
| Ethnicity (L2)                              | 0.011                                 | 0.007                 | .102           |
| Body Mass Index (L2)                        | < 0.001                               | 0.001                 | .917           |
| Subjective Social Status (L2)               | 0.004                                 | 0.002                 | .057           |
| <b>Beta Agonist Use (L1 slope)</b>          |                                       |                       |                |
| Intercept (L2)                              | 0.033                                 | 0.008                 | < .001         |
| Age (L2)                                    | -0.003                                | 0.002                 | .072           |
| Gender (L2)                                 | -0.023                                | 0.010                 | .022           |
| Ethnicity (L2)                              | -0.008                                | 0.009                 | .363           |
| Body Mass Index (L2)                        | 0.001                                 | 0.001                 | .038           |
| Subjective Social Status (L2)               | -0.002                                | 0.002                 | .263           |
| <b>Non-Interpersonal Events (L1 Slope)</b>  |                                       |                       |                |
| Intercept (L2)                              | -0.072                                | 0.109                 | .511           |
| Age (L2)                                    | 0.037                                 | 0.029                 | .208           |
| Gender (L2)                                 | 0.177                                 | 0.127                 | .168           |
| Ethnicity (L2)                              | 0.197                                 | 0.141                 | .167           |
| Body Mass Index (L2)                        | -0.012                                | 0.024                 | .628           |
| Subjective Social Status (L2)               | 0.057                                 | 0.032                 | .084           |

<sup>a</sup> L1 = Level 1

<sup>b</sup> L2 = Level 2
